# Supplementary material for: Fostering Self-Protection against Impacts of Heavy Rain at the Municipal Level
Source: MDPI journal article supplement (doi:10.3390/su13137019), 2021-06-22
Supplement: s1 [file s1]

Archive with 1 entries (1 files):
- sustainability-1237421-supplementary.pdf
