# Supplementary material for: Fostering Self-Protection against Impacts of Heavy Rain at the Municipal Level
Source: MDPI journal article supplement (doi:10.3390/su13137019), 2021-06-22
Supplement: s1 [file s1 › sustainability-1237421-supplementary.pdf]

Table S1 &amp; Table S2

**Table S1.** Complete list of items and answers per item / answer category in %; answers were coded 1(strongly disagree) to 6 (strongly agree)

| Item                                                                                                                                                   | Strongly agree | Agree | Slightly agree | Slightly disagree | Disagree | Strongly disagree | Do not know | n.s. |
|--------------------------------------------------------------------------------------------------------------------------------------------------------|----------------|-------|----------------|-------------------|----------|-------------------|-------------|------|
| <b>1. HEAVY RAIN EVENTS AND ADPTATION IN YOUR MUNICIPALITY</b>                                                                                         |                |       |                |                   |          |                   |             |      |
| My municipality has already been affected by heavy rain events in the past.                                                                            | 66.2           | 24.7  | 9.1            | 0                 | 0        | 0                 | 0           |      |
| My municipality will be strongly affected by heavy rain events in the upcoming years.                                                                  | 33.8           | 32.5  | 23.4           | 1.3               | 0        | 0                 | 9.1         |      |
| My department (work area) can initiate effective protective measures regarding heavy rain / flooding.                                                  | 33.8           | 42.9  | 15.6           | 7.8               | 0        | 0                 | 0           |      |
| Protective measures against heavy rain / flooding by governmental actors are sufficient to also protect private households from flood-related damages. | 3.9            | 1.3   | 3.9            | 11.7              | 39.0     | 39.0              | 1.3         |      |
| Private households are, despite potential barriers, capable to implement effective (self-protective) measures against heavy rain / flooding.           | 24.7           | 45.5  | 27.3           | 1.3               | 1.3      | 0                 | 0           |      |
| Through joint action (government / citizens) we can implement effective measures again heavy rain / flooding in our municipality.                      | 42.9           | 44.2  | 11.7           | 0                 | 1.3      | 0                 | 0           |      |
| It is mainly with the responsibility of governmental bodies to implement measures against heavy rain / flooding.                                       | 6.5            | 13.0  | 31.2           | 20.8              | 19.5     | 9.1               | 0           |      |
| Private households are also highly responsible to implement measures against heavy rain / flooding.                                                    | 33.8           | 42.9  | 19.5           | 1.3               | 2.6      | 0                 | 0           |      |
| I have extensive knowledge regarding the potential threats to my municipality by heavy rain events.                                                    | 20.8           | 42.9  | 22.1           | 11.7              | 2.6      | 0                 | 0           |      |
| I have extensive knowledge regarding my department's (work area) possibilities to foster / implement protection against heavy rain / flooding.         | 24.7           | 50.6  | 19.5           | 2.6               | 2.6      | 0                 | 0           |      |

| Item                                                                                                                                                       | Strongly agree | Agree | Slightly agree | Slightly disagree | Disagree | Strongly disagree | Do not know | n.s. |
|------------------------------------------------------------------------------------------------------------------------------------------------------------|----------------|-------|----------------|-------------------|----------|-------------------|-------------|------|
| <b>2. STRUCTURAL MEASURES (PLANNING PRECAUTION) IN THE MUNICIPALITY</b>                                                                                    |                |       |                |                   |          |                   |             |      |
| <b>Strategies based on infiltration</b>                                                                                                                    |                |       |                |                   |          |                   |             |      |
| <i>Decentral infiltration and evaporation</i>                                                                                                              |                |       |                |                   |          |                   |             |      |
| Very effective                                                                                                                                             | 26.0           | 45.5  | 16.9           | 7.8               | 3.9      | 0                 | 0           | 0    |
| Very realizable                                                                                                                                            | 2.6            | 18.2  | 24.7           | 35.1              | 18.2     | 0                 | 1.3         | 0    |
| <i>Central infiltration</i>                                                                                                                                |                |       |                |                   |          |                   |             |      |
| Very effective                                                                                                                                             | 5.2            | 33.8  | 28.6           | 22.1              | 7.8      | 0                 | 2.6         | 0    |
| Very realizable                                                                                                                                            | 0              | 5.2   | 22.1           | 46.8              | 20.8     | 0                 | 5.2         | 0    |
| <i>Protection of and creation of retention areas</i>                                                                                                       |                |       |                |                   |          |                   |             |      |
| Very effective                                                                                                                                             | 40.3           | 53.2  | 6.5            | 0                 | 0        | 0                 | 0           | 0    |
| Very realizable                                                                                                                                            | 0              | 5.2   | 18.2           | 50.6              | 20.8     | 3.9               | 1.3         | 0    |
| <i>(Partial) unsealing of sealed surfaces</i>                                                                                                              |                |       |                |                   |          |                   |             |      |
| Very effective                                                                                                                                             | 20.8           | 41.6  | 29.9           | 7.8               | 0        | 0                 | 0           | 0    |
| Very realizable                                                                                                                                            | 1.3            | 5.2   | 33.8           | 35.1              | 15.6     | 9.1               | 0           | 0    |
| <b>Strategies based on buffering</b>                                                                                                                       |                |       |                |                   |          |                   |             |      |
| <i>Detention of discharge peaks in or on buildings (e.g., collection of water on rooftops or in reservoirs below the driveways to underground parking)</i> |                |       |                |                   |          |                   |             |      |
| Very effective                                                                                                                                             | 19.5           | 44.2  | 26.0           | 3.9               | 3.9      | 0                 | 0           | 0    |
| Very realizable                                                                                                                                            | 0              | 6.5   | 29.9           | 33.8              | 22.1     | 0                 | 0           | 0    |
| <i>Multifunction use of traffic areas and open spaces (e.g., temporary detention of rain water on green and recreational areas and on parking lots)</i>    |                |       |                |                   |          |                   |             |      |
| Very effective                                                                                                                                             | 37.7           | 46.8  | 9.1            | 6.5               | 0        | 0                 | 0           | 0    |
| Very realizable                                                                                                                                            | 0              | 10.4  | 18.2           | 41.6              | 23.4     | 5.2               | 0           | 0    |
| <b>Strategies based on delay</b>                                                                                                                           |                |       |                |                   |          |                   |             |      |
| <i>Greening of rooftops</i>                                                                                                                                |                |       |                |                   |          |                   |             |      |
| Very effective                                                                                                                                             | 20.8           | 41.6  | 29.9           | 3.9               | 3.9      | 0                 | 0           | 0    |
| Very realizable                                                                                                                                            | 1.3            | 15.6  | 41.6           | 24.7              | 13.0     | 0                 | 2.6         | 1.3  |
| <i>Construction of detention basins</i>                                                                                                                    |                |       |                |                   |          |                   |             |      |
| Very effective                                                                                                                                             | 22.1           | 51.9  | 23.4           | 1.3               | 1.3      | 0                 | 0           | 0    |
| Very realizable                                                                                                                                            | 0              | 7.8   | 33.8           | 35.1              | 20.8     | 1.3               | 0           | 0    |
| <b>Strategies based on drainage</b>                                                                                                                        |                |       |                |                   |          |                   |             |      |
| <i>Reactivation of former ditches and watercourses</i>                                                                                                     |                |       |                |                   |          |                   |             |      |
| Very effective                                                                                                                                             | 27.3           | 49.4  | 16.9           | 2.6               | 0        | 0                 | 3.9         | 0    |
| Very realizable                                                                                                                                            | 1.3            | 10.4  | 16.9           | 36.4              | 24.7     | 2.6               | 7.8         | 0    |
| <i>Open drainage of rainwater</i>                                                                                                                          |                |       |                |                   |          |                   |             |      |
| Very effective                                                                                                                                             | 16.9           | 49.4  | 19.5           | 9.1               | 0        | 0                 | 5.2         | 0    |
| Very realizable                                                                                                                                            | 0              | 9.1   | 28.6           | 40.3              | 11.7     | 2.6               | 6.5         | 1.3  |
| <i>Emergency drainage via streets and walkways</i>                                                                                                         |                |       |                |                   |          |                   |             |      |
| Very effective                                                                                                                                             | 28.6           | 24.7  | 26.0           | 13.0              | 0        | 1.3               | 6.5         | 0    |
| Very realizable                                                                                                                                            | 5.2            | 9.1   | 29.9           | 27.3              | 13.0     | 2.6               | 13.0        | 0    |
| <b>Draining water of outer areas</b>                                                                                                                       |                |       |                |                   |          |                   |             |      |
| <i>Avoiding the discharge of rainwater from agricultural areas into the sewage water system and into residential areas.</i>                                |                |       |                |                   |          |                   |             |      |
| Very effective                                                                                                                                             | 26.0           | 37.7  | 10.4           | 5.2               | 1.3      | 0                 | 19.5        | 0    |
| Very realizable                                                                                                                                            | 0              | 2.6   | 24.7           | 26.0              | 14.3     | 1.3               | 29.9        | 1.3  |
| <i>Systematic drainage of runoff water in the outskirts of the municipality and erosion protection</i>                                                     |                |       |                |                   |          |                   |             |      |
| Very effective                                                                                                                                             | 24.7           | 31.2  | 11.7           | 3.9               | 0        | 0                 | 27.3        | 1.3  |
| Very realizable                                                                                                                                            | 0              | 1.3   | 19.5           | 26.0              | 13.0     | 2.6               | 35.1        | 2.6  |

| Item                                                                                                                                                                                           | Strongly agree | Agree | Slightly agree | Slightly disagree | Disagree | Strongly disagree | Do not know | n.s. |
|------------------------------------------------------------------------------------------------------------------------------------------------------------------------------------------------|----------------|-------|----------------|-------------------|----------|-------------------|-------------|------|
| <b>General</b>                                                                                                                                                                                 |                |       |                |                   |          |                   |             |      |
| <i>A concept for water-sensitive planning and development tailored to the municipal's needs providing guidelines for municipal decision-making and acting</i>                                  |                |       |                |                   |          |                   |             |      |
| Very effective                                                                                                                                                                                 | 31.2           | 42.9  | 16.9           | 2.6               | 1.3      | 0                 | 3.9         | 1.3  |
| Very realizable                                                                                                                                                                                | 3.9            | 13.0  | 29.9           | 29.9              | 13.0     | 1.3               | 7.8         | 1.3  |
| <i>Legally binding standards for the Town and County Planning Code</i>                                                                                                                         |                |       |                |                   |          |                   |             |      |
| Very effective                                                                                                                                                                                 | 32.5           | 44.2  | 16.9           | 2.6               | 0        | 0                 | 3.9         | 0    |
| Very realizable                                                                                                                                                                                | 3.9            | 9.1   | 31.2           | 36.4              | 10.4     | 1.3               | 7.8         | 0    |
| <b>3. ACTIVATION MEASURES – ACTIVATING CITIZENS TO TAKE SELF-PROTECTIVE MEASURES</b>                                                                                                           |                |       |                |                   |          |                   |             |      |
| <i>Model houses regarding heavy rainfall events: Activation of selected private households in different neighborhoods that implement exemplary self-protective measures</i>                    |                |       |                |                   |          |                   |             |      |
| Very effective                                                                                                                                                                                 | 16.9           | 35.1  | 29.9           | 9.1               | 0        | 0                 | 9.1         | 0    |
| Very realizable                                                                                                                                                                                | 1.3            | 9.1   | 29.9           | 33.8              | 9.1      | 2.6               | 13.0        | 1.3  |
| <i>Hazard maps for heavy rain events that show citizens if their property is located in a potentially hazardous area</i>                                                                       |                |       |                |                   |          |                   |             |      |
| Very effective                                                                                                                                                                                 | 45.5           | 35.1  | 11.7           | 6.5               | 0        | 0                 | 1.3         | 0    |
| Very realizable                                                                                                                                                                                | 22.1           | 41.6  | 23.4           | 7.8               | 2.6      | 0                 | 2.6         | 0    |
| <i>Indicating areas at risk from heavy rain / flooding in land-use plans</i>                                                                                                                   |                |       |                |                   |          |                   |             |      |
| Very effective                                                                                                                                                                                 | 33.8           | 32.5  | 20.8           | 7.8               | 0        | 0                 | 3.9         | 1.3  |
| Very realizable                                                                                                                                                                                | 14.3           | 42.9  | 28.6           | 6.5               | 0        | 0                 | 6.5         | 1.3  |
| <i>Charts indicating responsibilities regarding structural measures / planning vs. self-protection that can be used for communication with citizens</i>                                        |                |       |                |                   |          |                   |             |      |
| Very effective                                                                                                                                                                                 | 23.4           | 32.5  | 27.3           | 5.2               | 0        | 0                 | 10.4        | 1.3  |
| Very realizable                                                                                                                                                                                | 14.3           | 39.0  | 23.4           | 6.5               | 1.3      | 0                 | 13.0        | 2.6  |
| <i>Flood pass: Risk assessment of private property including information on self-protective measures</i>                                                                                       |                |       |                |                   |          |                   |             |      |
| Very effective                                                                                                                                                                                 | 27.3           | 46.8  | 13.0           | 5.2               | 0        | 0                 | 7.8         | 0    |
| Very realizable                                                                                                                                                                                | 14.3           | 29.9  | 27.3           | 15.6              | 3.9      | 0                 | 9.1         | 0    |
| <i>Information brochures for private households, informing citizens about heavy rain related risks and self-protective measures</i>                                                            |                |       |                |                   |          |                   |             |      |
| Very effective                                                                                                                                                                                 | 22.1           | 37.7  | 32.5           | 5.2               | 0        | 0                 | 2.6         | 0    |
| Very realizable                                                                                                                                                                                | 28.6           | 50.6  | 13.0           | 2.6               | 1.3      | 0                 | 3.9         | 0    |
| <i>Information brochures for those authorized to present building documents, that are to encourage those authorized to promote self-protection when in touch with clients / house builders</i> |                |       |                |                   |          |                   |             |      |
| Very effective                                                                                                                                                                                 | 27.3           | 44.2  | 19.5           | 5.2               | 0        | 0                 | 3.9         | 0    |
| Very realizable                                                                                                                                                                                | 22.1           | 51.9  | 16.9           | 2.6               | 1.3      | 0                 | 5.2         | 0    |
| <i>Municipal consultation offers, offering citizens information on potential risks and self-protective measures</i>                                                                            |                |       |                |                   |          |                   |             |      |
| Very effective                                                                                                                                                                                 | 29.9           | 41.6  | 22.1           | 5.2               | 0        | 0                 | 1.3         | 0    |
| Very realizable                                                                                                                                                                                | 13.0           | 33.8  | 39.0           | 10.4              | 2.6      | 0                 | 1.3         | 0    |
| <i>Heavy rain related standards for house builders in development areas (e.g., concerning sealing)</i>                                                                                         |                |       |                |                   |          |                   |             |      |
| Very effective                                                                                                                                                                                 | 46.8           | 35.1  | 13.0           | 2.6               | 0        | 0                 | 2.6         | 0    |
| Very realizable                                                                                                                                                                                | 11.7           | 37.7  | 23.4           | 19.5              | 2.6      | 1.3               | 3.9         | 0    |
| <i>Standards for house owners of existing buildings to install backflow flaps</i>                                                                                                              |                |       |                |                   |          |                   |             |      |
| Very effective                                                                                                                                                                                 | 53.2           | 31.2  | 7.8            | 3.9               | 0        | 0                 | 3.9         | 0    |
| Very realizable                                                                                                                                                                                | 33.8           | 15.6  | 16.9           | 22.1              | 2.6      | 1.3               | 7.8         | 0    |
| <i>Photographic documentation of past regional flood damages</i>                                                                                                                               |                |       |                |                   |          |                   |             |      |
| Very effective                                                                                                                                                                                 | 16.9           | 23.4  | 32.5           | 19.5              | 2.6      | 0                 | 3.9         | 1.3  |
| Very realizable                                                                                                                                                                                | 23.4           | 29.9  | 26.0           | 10.4              | 2.6      | 1.3               | 5.2         | 1.3  |
| <i>Higher standards in reconstruction or expansion plans for existing buildings and for new buildings (e.g. regarding infiltration, backwater, sealing, green roofs)</i>                       |                |       |                |                   |          |                   |             |      |
| Very effective                                                                                                                                                                                 | 36.4           | 39.0  | 19.5           | 0                 | 0        | 0                 | 3.9         | 1.3  |
| Very realizable                                                                                                                                                                                | 13.0           | 9.1   | 32.5           | 33.8              | 3.9      | 1.3               | 5.2         | 1.3  |

[illegible]

**Table S2.** Coefficients for the explanatory variables from multiple regression analyses for the four dependent variables.

|                                                                                           | B      | SE    | t      | Sig   |
|-------------------------------------------------------------------------------------------|--------|-------|--------|-------|
| <i>Model for D1.1 Motivation for activation measures</i>                                  |        |       |        |       |
| Constant                                                                                  | -1.36  | 1.313 | -1.201 | 0.234 |
| E1                                                                                        | 0.018  | 0.152 | 0.119  | 0.905 |
| E2                                                                                        | 0.146  | 0.174 | 0.838  | 0.405 |
| E3                                                                                        | 0.207  | 0.157 | 1.318  | 0.192 |
| F1**                                                                                      | 0.483  | 0.122 | 3.968  | 0.000 |
| Res2                                                                                      | 0.208  | 0.147 | 1.416  | 0.161 |
| K1*                                                                                       | 0.417  | 0.191 | 2.178  | 0.033 |
| K2                                                                                        | -0.201 | 0.227 | -0.888 | 0.378 |
| <i>Model for D2.1 Motivation for planning measures</i>                                    |        |       |        |       |
| Constant                                                                                  | 0.991  | 0.872 | 1.136  | 0.260 |
| E1                                                                                        | 0.136  | 0.158 | 0.864  | 0.391 |
| F1                                                                                        | 0.103  | 0.129 | 0.802  | 0.425 |
| K2**                                                                                      | 0.474  | 0.174 | 2.717  | 0.008 |
| <i>Model for D1.2 Assessed status of implementation of activating measures</i>            |        |       |        |       |
| Constant                                                                                  | 0.039  | 0.865 | 0.045  | 0.964 |
| F1**                                                                                      | 0.345  | 0.127 | 2.717  | 0.008 |
| K1                                                                                        | 0.177  | 0.197 | 0.894  | 0.375 |
| K2                                                                                        | 0.346  | 0.260 | 1.329  | 0.189 |
| <i>Model for D2.2 Assessed status of implementation of planning / structural measures</i> |        |       |        |       |
| Constant                                                                                  | 2.731  | 0.600 | 4.554  | 0.000 |
| K1*                                                                                       | 0.326  | 0.124 | 2.622  | 0.011 |
